# Supplementary figures and images for: The innate immune sensor IFI16 recognizes foreign DNA in the nucleus by scanning along the duplex
Source: eLife journal article supplement (doi:10.7554/elife.11721), 2015-12-16

**Figure 2- figure suppl. 4**

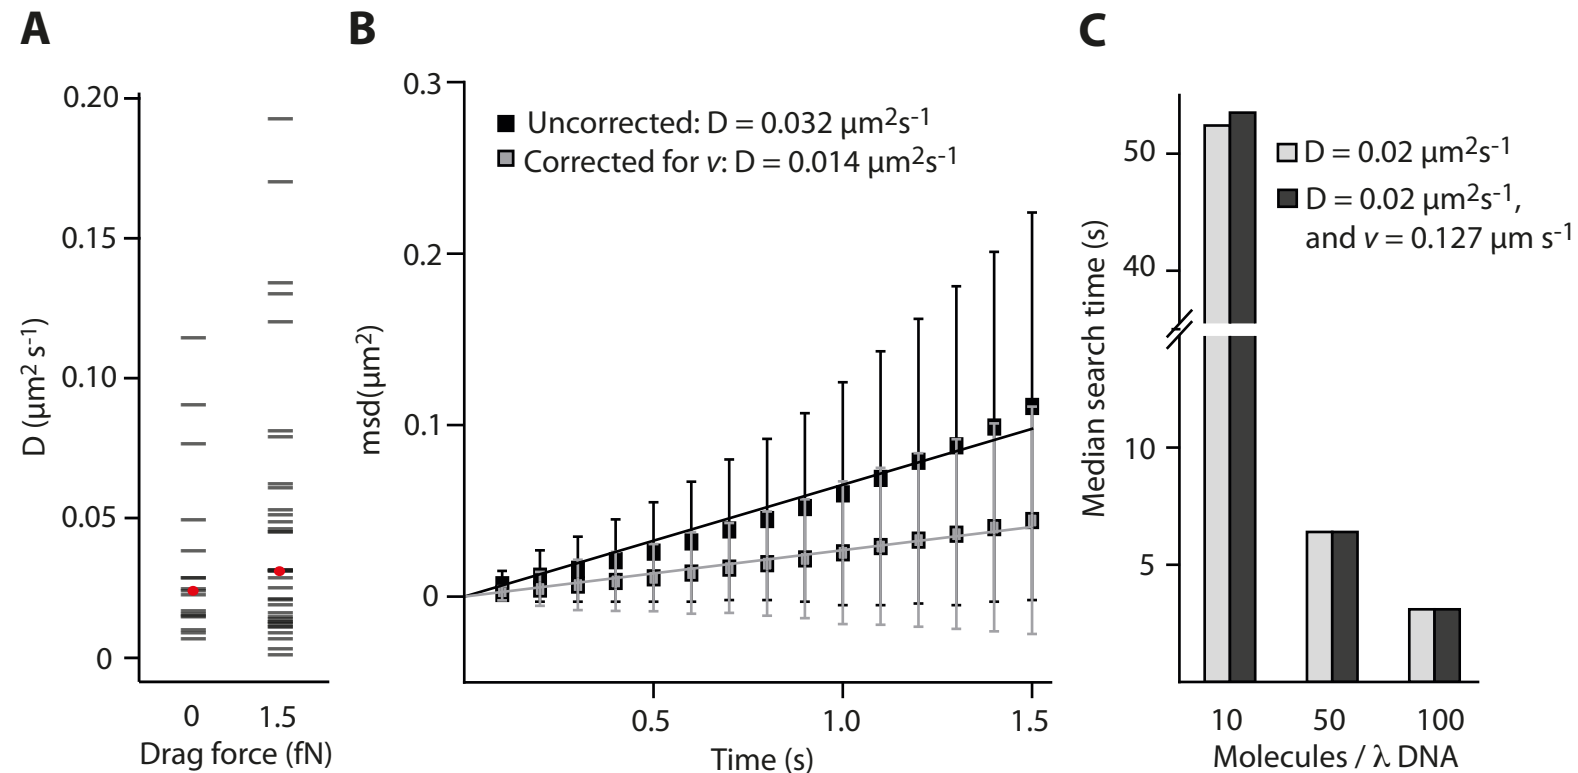

Supplement: supp [file elife-11721-supp-v1.zip]

# Figure 2- figure suppl. 3

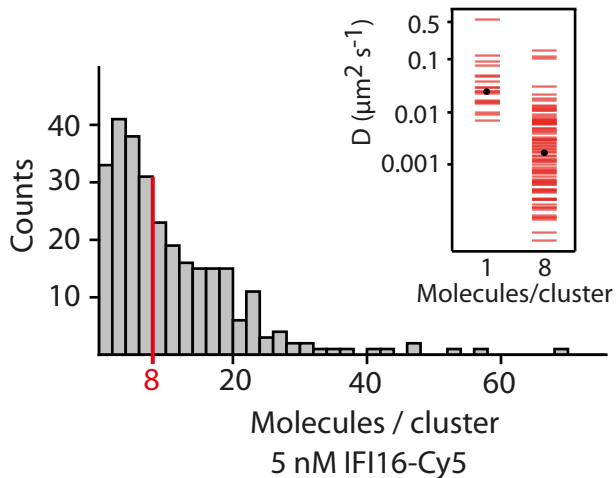

Supplement: supp [file elife-11721-supp-v1.zip]

**Figure 1- figure suppl. 1**

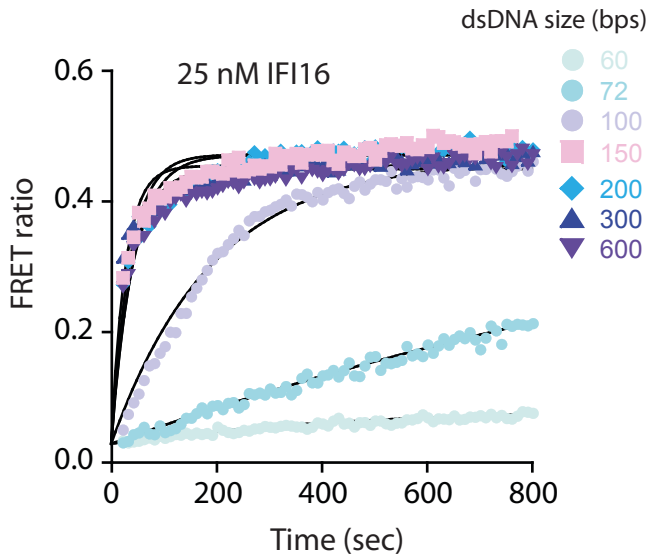

Supplement: supp [file elife-11721-supp-v1.zip]

## Figure 2- figure suppl. 2

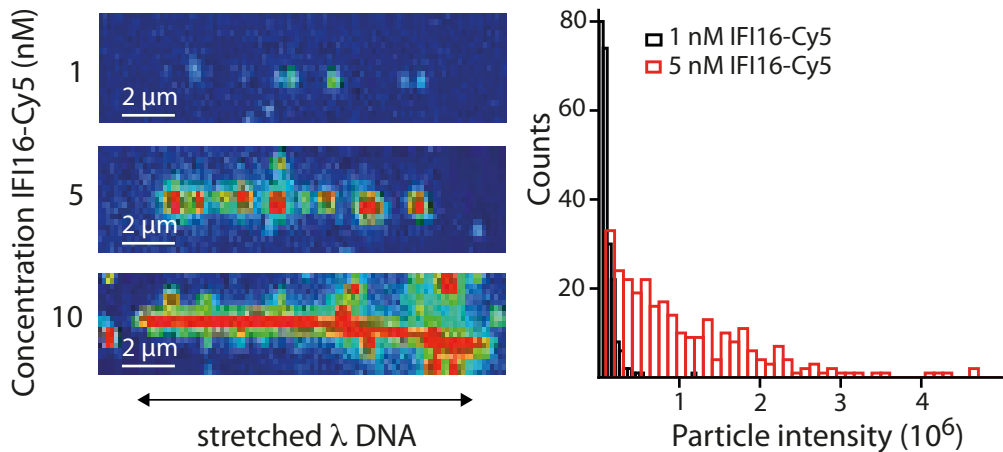

Supplement: supp [file elife-11721-supp-v1.zip]

**Figure 4- figure suppl. 3**

**A**

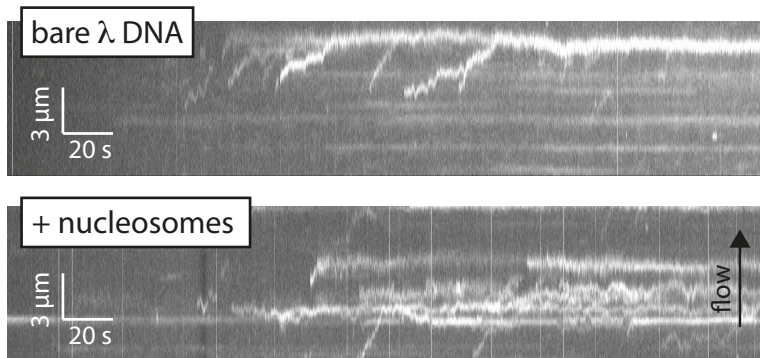

**B**

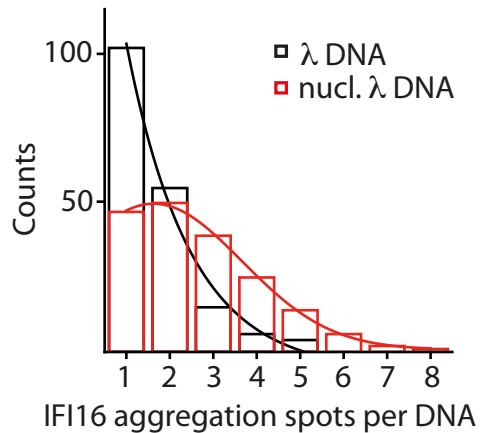

Supplement: supp [file elife-11721-supp-v1.zip]

# Figure 3- figure suppl. 1

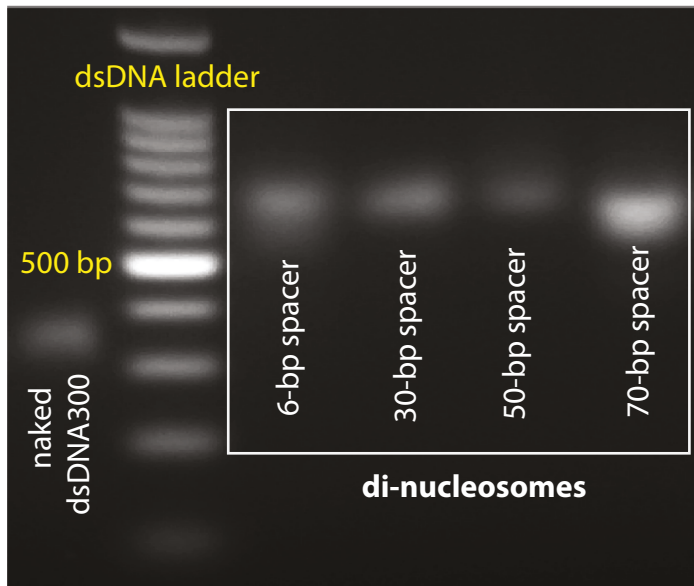

Supplement: supp [file elife-11721-supp-v1.zip]

# Figure 4- figure suppl. 1

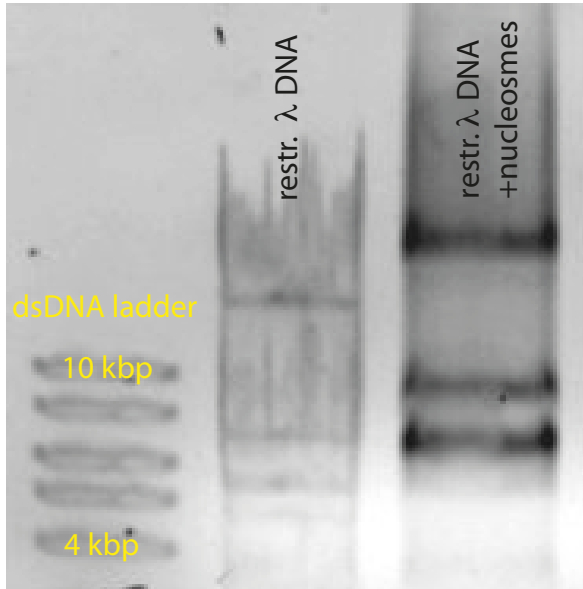

Supplement: supp [file elife-11721-supp-v1.zip]

**Figure 4- figure suppl. 2**

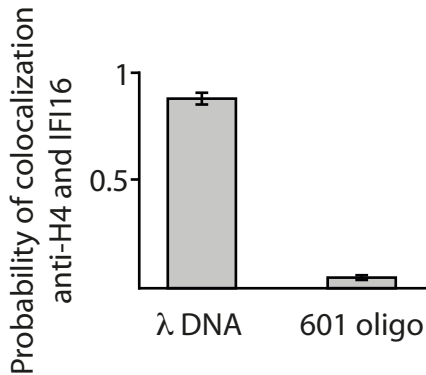

Supplement: supp [file elife-11721-supp-v1.zip]

**Figure 2- figure suppl. 1**

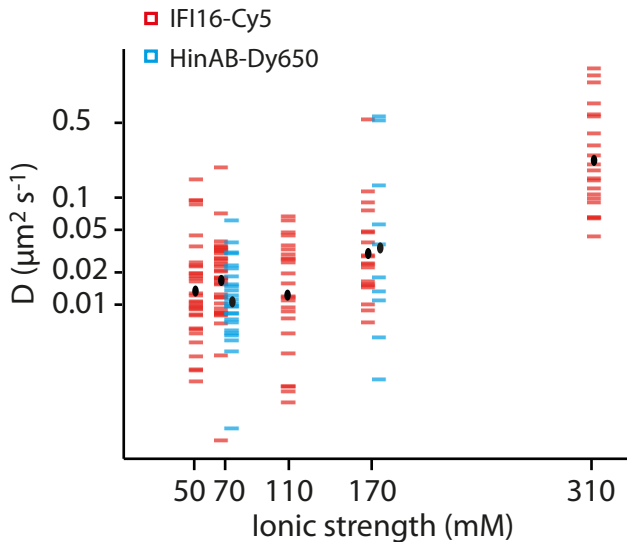

Supplement: supp [file elife-11721-supp-v1.zip]
